# Supplementary material for: Potential savings through single-dose intravenous Dalbavancin in long-term MRSA infection treatment – a health economic analysis using German DRG data
Source: PubMed Central journal article supplement (PMC6839362; doi:10.3205/id000043), 2019-10-23
Supplement: ID-07-03-s-001.pdf [file ID-07-03-s-001.pdf]

## Definitions for infection groups and infections with corresponding ICD-10 codes

| <b>Infection Group / Infection / ICD-10-Code + Text</b>                                                                  |
|--------------------------------------------------------------------------------------------------------------------------|
| <b>ABSSSI</b>                                                                                                            |
| <b>Cellulitis/erysipelas</b>                                                                                             |
| L00.0: Staphylococcal scalded skin syndrome [SSS syndrome]: infestation of less than 30% of the body surface             |
| L00.1: Staphylococcal scalded skin syndrome [SSS syndrome]: infestation of 30% of the body surface and more              |
| L00: Staphylococcal scalded skin syndrome                                                                                |
| L03.01: Cellulitis of finger                                                                                             |
| L03.02: Cellulitis of toe                                                                                                |
| L03.10: Cellulitis of upper limb                                                                                         |
| L03.11: Cellulitis of lower limb                                                                                         |
| L03.2: Cellulitis of face                                                                                                |
| L03.3: Cellulitis of trunk                                                                                               |
| L03.9: Cellulitis, unspecified                                                                                           |
| L03: Cellulitis                                                                                                          |
| L04.3: Acute lymphadenitis of lower limb                                                                                 |
| L08.8: Other specified local infections of skin and subcutaneous tissue                                                  |
| L08.9: Local infection of skin and subcutaneous tissue, unspecified                                                      |
| <b>Major cutaneous abscess</b>                                                                                           |
| K61.0: Anal abscess                                                                                                      |
| K61.1: Rectal abscess                                                                                                    |
| K61.2: Anorectal abscess                                                                                                 |
| K61.3: Ischiorectal abscess                                                                                              |
| K61.4: Intrasphincteric abscess                                                                                          |
| K61: Abscess in the anal and rectal region                                                                               |
| L02.0: Cutaneous abscess, furuncle and carbuncle of face                                                                 |
| L02.1: Cutaneous abscess, furuncle and carbuncle of neck                                                                 |
| L02.2: Cutaneous abscess, furuncle and carbuncle of trunk                                                                |
| L02.3: Cutaneous abscess, furuncle and carbuncle of buttock                                                              |
| L02.4: Cutaneous abscess, furuncle and carbuncle of limb                                                                 |
| L02.8: Cutaneous abscess, furuncle and carbuncle of other sites                                                          |
| L02.9: Cutaneous abscess, furuncle and carbuncle, unspecified                                                            |
| L02: Skin abscess, furun and carbuncle                                                                                   |
| L05.0: Pilonidal cyst with abscess                                                                                       |
| <b>Wound infection</b>                                                                                                   |
| E10.74: Diabetes mellitus, type 1: with multiple complications: With diabetic foot syndrome, not referred to as derailed |
| E10.75: Diabetes mellitus, type 1: With multiple complications: With diabetic foot syndrome, designated as derailed      |
| E11.74: Diabetes mellitus, type 2: with multiple complications: with diabetic foot syndrome, not referred to as derailed |
| E11.75: Diabetes mellitus, type 2: with multiple complications: With diabetic foot syndrome, designated as derailed      |
| I70.24: Atherosclerosis of arteries of extremities with gangrene                                                         |
| I70.25: Atherosclerosis of the extremity arteries: pelvic-leg type, with gangrene                                        |
| I83.0: Varicose veins of lower extremities with ulcer                                                                    |
| I83.2: Varicose veins of lower extremities with both ulcer and inflammation                                              |
| L89.1: Decubitus of 2nd degree                                                                                           |
| L89.2: Decubitus of the 3rd degree                                                                                       |
| L89.3: Decubitus of the 4th degree                                                                                       |

|                                                                                                                      |
|----------------------------------------------------------------------------------------------------------------------|
| L89.9: Decubitus, degree unspecified                                                                                 |
| L97: Ulcer of lower limb, not elsewhere classified                                                                   |
| I98.4: Chronic ulcer of skin, not elsewhere classified                                                               |
| R02: Gangrene, not elsewhere classified                                                                              |
| T79.3: Post-traumatic wound infection, not elsewhere classified                                                      |
| T81.4: Infection following a procedure, not elsewhere classified                                                     |
| T87.4: Infection of amputation stump                                                                                 |
| <b>Joint and Prostheses Infections</b>                                                                               |
| <b>Infection of joint prostheses</b>                                                                                 |
| T84.5: Infection and inflammatory reaction due to internal joint prosthesis                                          |
| <b>Infection of osteosyntheses materials</b>                                                                         |
| T84.6: Infection and inflammatory reaction due to internal fixation device [any site]                                |
| <b>Infection other orthopedic prosthesis</b>                                                                         |
| T84.7: Infection and inflammatory reaction due to other internal orthopaedic prosthetic devices, implants and grafts |
| <b>Joint abscess</b>                                                                                                 |
| M00.81: Arthritis and polyarthritis due to other specified bacterial agents, shoulder region                         |
| M00.82: Arthritis and polyarthritis due to other specified bacterial agents, upper arm                               |
| M00.83: Arthritis and polyarthritis due to other specified bacterial agents, forearm                                 |
| M00.84: Arthritis and polyarthritis due to other specified bacterial agents, hand                                    |
| M00.85: Arthritis and polyarthritis due to other specified bacterial agents, pelvic region and thigh                 |
| M00.86: Arthritis and polyarthritis due to other specified bacterial agents, lower leg                               |
| M00.87: Arthritis and polyarthritis due to other specified bacterial agents, ankle and foot                          |
| M00.88: Arthritis and polyarthritis due to other specified bacterial agents, other site                              |
| M00.89: Arthritis and polyarthritis due to other specified bacterial agents, site unspecified                        |
| M00.90: Pyogenic arthritis, unspecified, multiple sites                                                              |
| M00.91: Pyogenic arthritis, unspecified, shoulder region                                                             |
| M00.92: Pyogenic arthritis, unspecified, upper arm                                                                   |
| M00.93: Pyogenic arthritis, unspecified, forearm                                                                     |
| M00.94: Pyogenic arthritis, unspecified, hand                                                                        |
| M00.95: Pyogenic arthritis, unspecified, pelvic region and thigh                                                     |
| M00.96: Pyogenic arthritis, unspecified, lower leg                                                                   |
| M00.97: Pyogenic arthritis, unspecified, ankle and foot                                                              |
| M00.98: Pyogenic arthritis, unspecified, other site                                                                  |
| M00.99: Pyogenic arthritis, unspecified, site unspecified                                                            |
| M00: Purulent arthritis                                                                                              |
| <b>Osteomyelitis</b>                                                                                                 |
| M86: Osteomyelitis                                                                                                   |
